# Supplementary material for: Characterization of SSBP1-related optic atrophy and foveopathy
Source: PubMed Central journal article supplement (PMC8455542; doi:10.1038/s41598-021-98150-1), 2021-09-21
Supplement: 41598_2021_98150_MOESM1_ESM.pdf [file 41598_2021_98150_MOESM1_ESM.pdf]

**Table 1: Clinical and imaging data of the 27 included patients carrying the *SSBP1* c.113G>A variant: from asymptomatic carriers to rod cone dystrophy.**

| Patient, Gender | Age of onset | VA RE/LE Age                                                 | Pallor | Initial RNFL TSNI RE/LE Age | Final RNFL TSNI RE/LE Age                                  | Initial ETDRS Thickness RE-LE Foveal Central 1mm Nasal 3mm Sup 3mm Temp 3mm Inf 3mm Age | Final ETDRS Thickness RE-LE Foveal Central 1mm Nasal 3mm Sup 3mm Temp 3mm Inf 3mm Age | Phenotypes        |
|-----------------|--------------|--------------------------------------------------------------|--------|-----------------------------|------------------------------------------------------------|-----------------------------------------------------------------------------------------|---------------------------------------------------------------------------------------|-------------------|
| IV:6, M         | 12           | 20/50-20/50 at 12 years<br><br>20/400-20/400 at 83 years.    | T      | No SD-OCT at baseline       | T 33/39<br>S 60/110<br>N 52/88<br>I 76/53<br>At 83 years   | No SD-OCT at baseline                                                                   | F208-209<br>C241-235<br>N266-254<br>S257-257<br>T274-256<br>I262-253<br>At 83 years   | DOA<br>AMD drusen |
| V:13, M         | 6            | 20/40-20/40 at 30 years<br><br>20/60 -20/50 at 46 years      | T      | No SD-OCT at baseline       | T 32/NA<br>S 33/NA<br>N 48/NA<br>I 69/NA<br>At 46 years    | No SD-OCT at baseline                                                                   | F203-215<br>C240-267<br>N260-263<br>S233-259<br>T266-273<br>I279-292<br>At 46 years   | DOA               |
| V:28, F         | 30           | 20/25-20/32 at 33 years<br><br>20/50-20/40 at 45 years       | T      | No SD-OCT at baseline       | T 49/53<br>S 106/90<br>N 58/68<br>I 100/119<br>At 45 years | No SD-OCT at baseline                                                                   | F141-135<br>C185-179<br>N257-251<br>S255-244<br>T249-246<br>I254-271<br>At 45 years   | DOA               |
| V:41, F         | 6            | 20/200-20/200 at 15 years<br><br>20/4000-20/1000 At 67 years | T      | No SD-OCT at baseline       | T 17/4<br>S 57/51<br>N 41/36<br>I 52/47<br>At 67 years     | No SD-OCT at baseline                                                                   | F137-128<br>C191-189<br>N246-228<br>S233-229<br>T224-221<br>I237-227<br>At 67 years   | DOA               |

|          |    |                                                                  |   |                                                            |                                                         |                                                                                     |                                                                                     |     |
|----------|----|------------------------------------------------------------------|---|------------------------------------------------------------|---------------------------------------------------------|-------------------------------------------------------------------------------------|-------------------------------------------------------------------------------------|-----|
| VI:8, F  | 36 | 20/20-20/20<br>at 36 years                                       | T | T 34/37<br>S 77/84<br>N 51/50<br>I 91-83<br>At 36 years    | No follow-up                                            | F185-196<br>C239-247<br>N285-289<br>S286-291<br>T281-285<br>I280-283<br>At 36 years | No follow-up                                                                        | DOA |
| VI:19, M | 12 | 20/16-20/16<br>at 12 years                                       | T | T 34/36<br>S 123/111<br>N 79/85<br>I 130/97<br>At 12 years | No follow-up                                            | F217-216<br>C249-247<br>N280-279<br>SNR-NR<br>T280-277<br>UD-UD<br>At 12 years      | No follow-up                                                                        | DOA |
| VI:20, M | 6  | 20/63-20/63<br>at 6 years<br><br>20/80-20/100<br>at 10 years     | T | No SD-OCT<br>at baseline                                   | T 25/24<br>S 96/90<br>N 52/47<br>I 81/79<br>At 10 years | No SD-OCT<br>at baseline                                                            | F217-212<br>C245-243<br>N287-286<br>S286-286<br>T280-276<br>I287-286<br>At 10 years | DOA |
| VI:34, F | 6  | 20/125-20/125<br>at 45 years                                     | T | No SD-OCT<br>at baseline                                   | T 23/24<br>S 72/68<br>N 66/64<br>I 81/68<br>At 45 years | No SD-OCT<br>at baseline                                                            | F153-152<br>C187-187<br>N263-260<br>S259-256<br>T253-250<br>I255-253<br>At 45 years | DOA |
| VI:35, F | 6  | 20/600-20/600<br>at 10 years<br><br>20/600-20/600<br>at 28 years | T | No SD-OCT<br>at baseline                                   | T 33/33<br>S 44/28<br>N 27/22<br>I 39/46<br>At 28 years | No SD-OCT<br>at baseline                                                            | F155-146<br>UD<br>At 28 years                                                       | DOA |

|          |    |                                                                                                      |   |                                                             |                                                             |                                                                                           |                                                                                     |       |
|----------|----|------------------------------------------------------------------------------------------------------|---|-------------------------------------------------------------|-------------------------------------------------------------|-------------------------------------------------------------------------------------------|-------------------------------------------------------------------------------------|-------|
| VII:3, F | 10 | 20/20-20/20<br>at 10 years<br><br>20/20-20/20<br>at 13 years                                         | T | T 58/49<br>S 121/121<br>N 76/72<br>I 127/130<br>At 10 years | T 53/40<br>S 114/122<br>N 55/61<br>I 130/132<br>At 13 years | F 200-200<br>Cube not done<br>At 10 years                                                 | F197-196<br>C255-253<br>N320-320<br>S328-327<br>T323-321<br>I324-323<br>At 13 years | DOA   |
| V:3, F   | 8  | 20/50-20/50<br>at 65 years<br><br>20/50-20/50<br>at 68 years                                         | T | No SD-OCT<br>at baseline                                    | T 25/26<br>S 67/68<br>N 52/49<br>I 70/64<br>At 68 years     | No SD-OCT<br>at baseline                                                                  | F152-147<br>C214-209<br>N273-270<br>S271-267<br>T264-261<br>I267-263<br>At 68 years | DOA+F |
| V:11, M  | 6  | 20/400-20/400<br>at 46 years<br><br>20/800-20/800<br>at 50 years<br><br>20/800-20/800<br>at 53 years | T | T 10/16<br>S 59/59<br>N 40/40<br>I 46/48<br>At 46 years     | T 10/21<br>S 59/59<br>N 40/40<br>I 46/48<br>At 53 years     | F 200-201<br>C 231-235<br>N 256-261<br>S 249-250<br>T 242-244<br>I 248-251<br>At 46 years | F203-215<br>C230-238<br>N255-259<br>S246-251<br>T241-245<br>I247-251<br>At 53 years | DOA+F |
| V:39, F  | 37 | 20/160-20/160<br>at 56 years<br><br>20/160-20/160<br>at 72 years                                     | T | No SD-OCT<br>at baseline                                    | T 12/10<br>S 52/60<br>N 41/49<br>I 58/61<br>At 72 years     | No SD-OCT<br>at baseline                                                                  | F161-175<br>C192-198<br>N247-247<br>UD-UD<br>T235-231<br>UD-UD<br>At 72 years       | DOA+F |

|          |    |                                                               |   |                                                           |                                                             |                                                                                     |                                                                                     |       |
|----------|----|---------------------------------------------------------------|---|-----------------------------------------------------------|-------------------------------------------------------------|-------------------------------------------------------------------------------------|-------------------------------------------------------------------------------------|-------|
| V:47, F  | 16 | 20/32-20/32<br>At 16 years<br><br>20/32-20/32<br>At 60 years  | T | No SD-OCT<br>at baseline                                  | T 52/46<br>S 106/115<br>N 87/89<br>I 116/110<br>At 60 years | No SD-OCT<br>at baseline                                                            | F186-181<br>C235-230<br>N315-313<br>S305-308<br>T303-303<br>I309-308<br>At 60 years | DOA+F |
| VI:4, M  | 9  | 20/32-20/32 at 11<br>years<br><br>20/63- 20/40<br>at 48 years | T | T 27/26<br>S 71/70<br>N 43/43<br>I 91/76<br>At 45 years   | T 26/27<br>S 72/72<br>N 42/43<br>I 90/79<br>At 48 years     | F198-207<br>C240-248<br>N287-291<br>S288-292<br>T286-286<br>I283-286<br>At 45 years | F204-214<br>C246-251<br>N290-293<br>S290-294<br>T286-287<br>I284-285<br>At 48 years | DOA+F |
| VI:17, M | 3  | 20/40-20/40<br>at 22 years<br><br>20/40-20/50 at 25<br>years  | T | T 26/26<br>S 65/87<br>N 50/44<br>I 110/113<br>At 22 years | T 28/26<br>S 64/88<br>N 49/42<br>I 113/110<br>At 25 years   | F176-177<br>C218-223<br>N285-285<br>S271-272<br>T267-269<br>I276-275<br>At 22 years | F173-184<br>C219-225<br>N287-286<br>S273-273<br>T268-272<br>I277-278<br>At 25 years | DOA+F |
| VI:21, M | 24 | 20/25-20/25<br>At 24 years<br><br>20/32-20/32<br>At 30 years  | T | No SD-OCT<br>at baseline                                  | T 36/38<br>S 90/105<br>N 68/65<br>I 86/93<br>At 30 years    | No SD-OCT<br>at baseline                                                            | F175-174<br>C208-205<br>N261-264<br>S258-264<br>T254-256<br>I260-258<br>At 30 years | DOA+F |
| VI:24, M | 4  | 20/32-20/32 at 4<br>years<br><br>20/32-20/32 at 11<br>years   | T | No SD-OCT<br>at baseline                                  | T 30/27<br>S 113/110<br>N 62/73<br>I 107/108<br>At 11 years | No SD-OCT<br>at baseline                                                            | F164-16<br>C205-203<br>N257-255<br>S256-259<br>T255-255<br>I256-255<br>At 11 years  | DOA+F |

|          |    |                                                                     |   |                                                            |                                                            |                          |                                                                                     |         |
|----------|----|---------------------------------------------------------------------|---|------------------------------------------------------------|------------------------------------------------------------|--------------------------|-------------------------------------------------------------------------------------|---------|
| VI:25, F | 5  | 20/25-20/25<br>At 5 years<br><br>20/25-20/25<br>At 14 years         | T | No SD-OCT<br>at baseline                                   | T 40/39<br>S 97/110<br>N 74/70<br>I 113/108<br>At 14 years | No SD-OCT<br>at baseline | F169-170<br>C202-199<br>N269-269<br>UD-UD<br>T262-259<br>UD-UD<br>At 14 years       | DOA+F   |
| VI:38, M | 17 | 20/32-20/32<br>at 17 years<br><br>20/63-20/50<br>at 28 years        | T | No SD-OCT<br>at baseline                                   | T 24/26<br>S 86/82<br>N 62/47<br>I 77/86<br>At 28 years    | No SD-OCT<br>at baseline | F183-179<br>C234-232<br>N293-294<br>S282-287<br>T288-293<br>I282-287<br>At 28 years | DOA+F   |
| VII:1, M | 5  | 20/50-20/50<br>at 6 years<br><br>20/50-20/50<br>at 8 years          | T | T 40/44<br>S 107/104<br>N 76/74<br>I 102/125<br>At 6 years | ND at 8 years                                              | ND at 6 years            | F179-182<br>C216-208<br>N274-265<br>S269-266<br>T269-263<br>I277-269<br>At 8 years  | DOA+F   |
| VII:8, F | 6  | 20/40-20/50<br>at 6 years<br><br>20/125-20/100<br>at 11 years       | T | No SD-OCT<br>at baseline                                   | RNFL unrealizable                                          | No SD-OCT<br>at baseline | F 169-175<br>UD                                                                     | DOA+F   |
| IV:17, F | 5  | 20/400-20/400<br>at 70 years                                        | T | NA OCT-3                                                   | Dead                                                       | NA OCT-3                 | dead                                                                                | DOA+RCD |
| V:42, M  | 6  | VA < 20/40<br>at the age of 18.<br><br>20/400-20/400<br>at 69 years | T | No SD-OCT                                                  | T 15/UD<br>S 40/UD<br>N 5/UD<br>I 66/UD<br>At 69 years     | No SD-OCT                | F136-156<br>C223-197<br>N285-249<br>S263-231<br>T247-225<br>I256-229<br>At 69 years | DOA+RCD |

|          |  |                            |    |                                                              |              |                                                                                     |              |              |
|----------|--|----------------------------|----|--------------------------------------------------------------|--------------|-------------------------------------------------------------------------------------|--------------|--------------|
| V:9, M   |  | 20/20-20/20<br>At 51 years | No | T 69/71<br>S 131/140<br>N 54/54<br>I 122/115<br>At 51 years  | No follow-up | F195-197<br>C246-246<br>N303-300<br>S301-302<br>T289-286<br>I296-295<br>At 51 years | No follow-up | Asymptomatic |
| VI:14, M |  | 20/20-20/20<br>At 15 years | No | T 79/73<br>S 134/142<br>N 77/89<br>I 149/140<br>At 15 years  | No follow-up | F254-232<br>No macular cube                                                         | No follow-up | Asymptomatic |
| VI:15, M |  | 20/20-20/20<br>At 11 years | No | T 79/74<br>S 140/141<br>N 104/96<br>I 146/151<br>At 11 years | No follow-up | F237-233<br>C285-282<br>N355-355<br>S349-346<br>T341-341<br>I355-356<br>At 11 years | No follow-up | Asymptomatic |

DOA: dominant optic atrophy. DOA+F: dominant optic atrophy and combined foveopathy. DOA+RCD: dominant optic atrophy and combined rod cone dystrophy. LE: Left eye. ND: not done. RE: right eye. RNFL: retinal nerve fiber layer. UD: unreliable data.
